# Supplementary material
Source: PubMed Central journal article supplement (PMC1851864)
Supplement: amjpathol_170_2_680__1.pdf [file amjpathol_170_2_680__1.pdf]

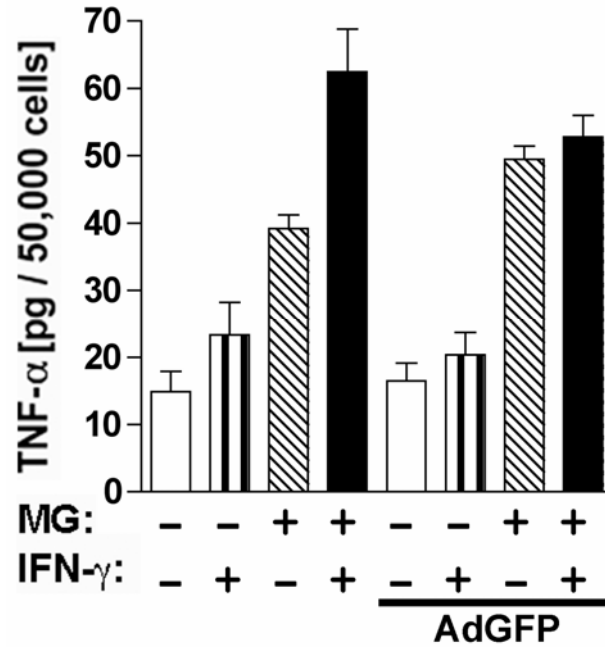

**Supplemental Figure S1.** Primary cultured astrocytes (50,000 cells/well) from WT or GRKO neonates were infected with or without 1.0 MOI adenovirus expressing GFP (100% GFP expression efficiency), and co-cultured with or without microglia (50,000 cells/well) of the same genetic background, followed by stimulation with IFN- $\gamma$  (10 ng/ml) for 24 hrs and quantification of secreted murine TNF- $\alpha$  by ELISA.
