# Supplementary material
Source: PubMed Central journal article supplement (PMC1851864)
Supplement: amjpathol_170_2_680__2.pdf [file amjpathol_170_2_680__2.pdf]

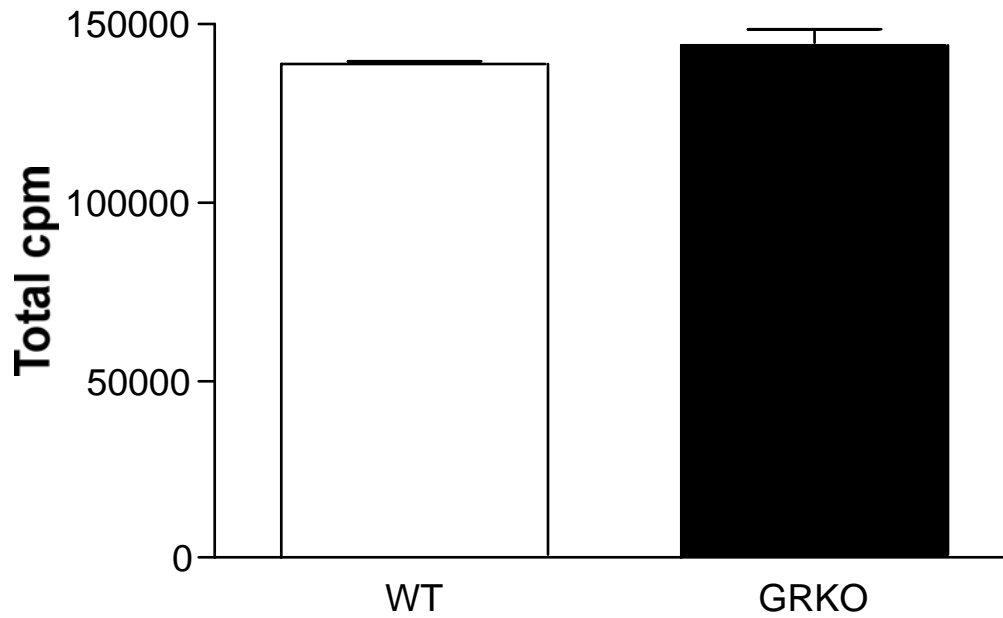

**Supplemental Figure S2. Basal A $\beta$  uptake by primary cultured microglia from WT and GRKO mice.** Primary culture of microglia from newborn WT or GRKO pups were plated on 24-well plates ( $5 \times 10^5$  cells/well) 24 hr prior to the study and incubated with  $1 \mu\text{M}$   $^{125}\text{I}$ -A $\beta$ 40 (200,000 cpm/ml, 1ml/well) for 1 hr at  $37^\circ\text{C}$ , washed extensively, and the cells were lysed for measuring the initial uptake of A $\beta$ . The data is shown as cpm/well. There was no statistical difference between two groups as determined by Student's *t*-test.
